# Supplementary material for: Comparison of PIC and EDTA-coupled acetamidobenzoxazolone probes as a specific marker for a 18 kDa protein (TSPO)
Source: Royal Society of Chemistry journal article supplement (doi:10.1039/d2nj06175a), 2023-01-01
Supplement: d2nj06175a1.pdf [file d2nj06175a1.pdf]

**Evaluation of PIC and EDTA coupled Acetamidobenzoxazolone probes as  
specific marker for 18 kDa protein (TSPO)**

Neelam kumari<sup>†,††</sup>, Priya Singh<sup>†</sup>, Deepika Singh<sup>†</sup>, Akanksha Mishra<sup>†</sup>, Ankur Kaul<sup>††</sup>, Himanshu  
Ojha<sup>††</sup>, Anjani Kumar Tiwari<sup>\*†</sup>

➤ **Characterization of bis(pyridin-2-ylmethyl)amine (2)**

**Physical state and Yield:** yellow oil, 72 %

$R_f = 0.3$  (20 % MeOH in  $\text{CHCl}_3$ )

**IR (KBr)  $\nu_{\text{max}}$ :** 3394, 2361, 1593, 1435, 769  $\text{cm}^{-1}$

**$^1\text{H}$  NMR (DMSO- $d_6$ , 400 MHz):**  $\delta$  8.48 (2H, d,  $J = 4.4$  Hz), 7.76-7.72 (2H, m), 7.45 (2H, d,  $J = 7.6$  Hz), 7.25-7.21 (2H, m), 3.82 (4H, s) and 3.76 (1H, brs)

**$^{13}\text{C}$  NMR (DMSO- $d_6$ , 100.6 MHz):**  $\delta$  160.10, 148.80, 136.50, 121.94, 121.83 and 54.02

**HR-ESI-TOF-MS:**  $m/z$  200.1185 ( $[\text{M}+\text{H}]^+$ ), calcd. for  $[\text{C}_{12}\text{H}_{13}\text{N}+\text{H}]^+$  200.1182

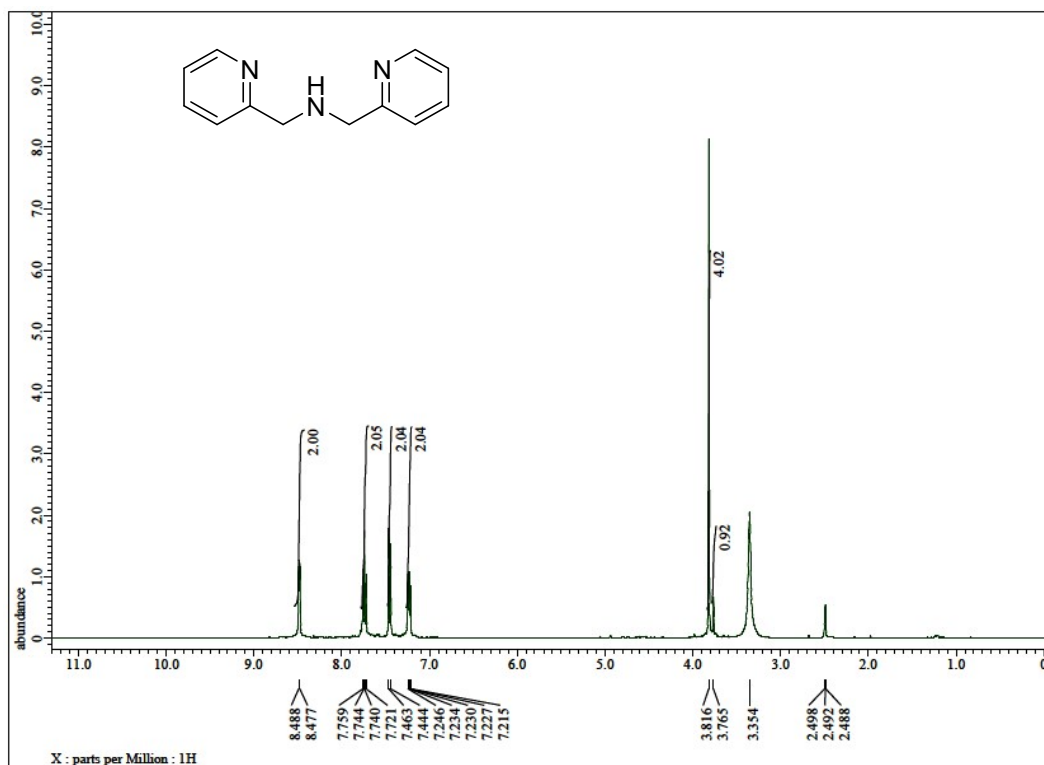

**Figure 1:**  $^1\text{H}$  NMR spectrum of compound 2 (DMSO- $d_6$ , 400 MHz)

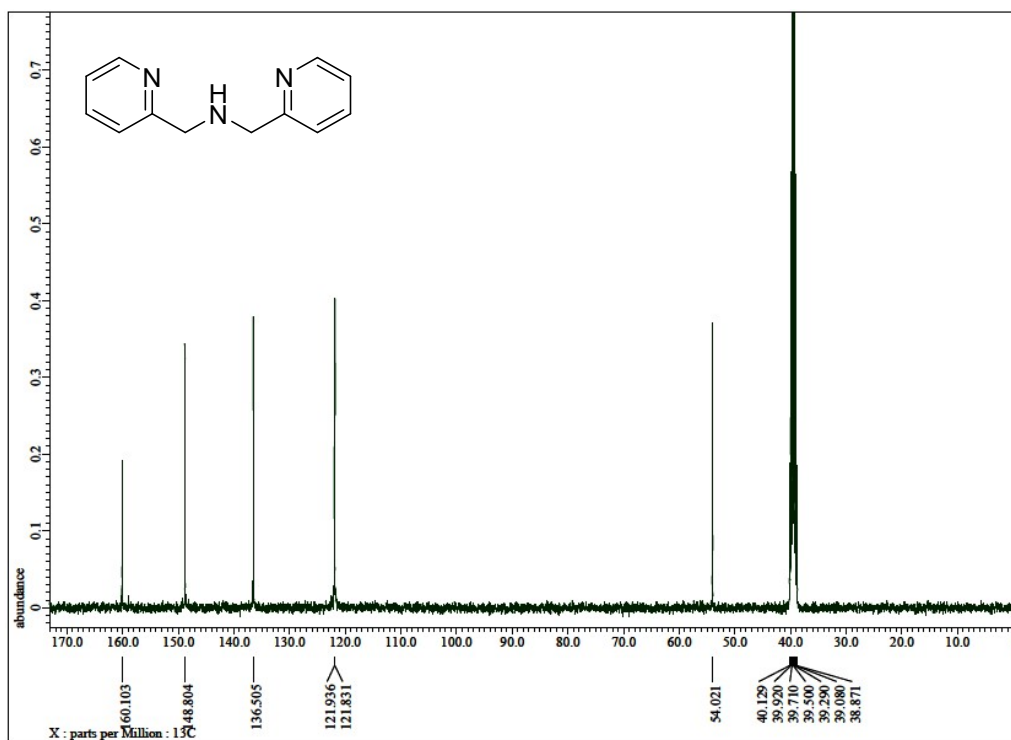

Figure 2:  $^{13}\text{C}$  NMR spectrum of compound 2 (DMSO- $d_6$ , 100.6 MHz)

➤ **Characterization of 2-(5-(2-bromoacetamido)-2-oxobenzo[d]oxazol3(2H)-yl)-N-methyl-N-phenylacetamide (4)**

**Physical state and yield:** Off white solid, 87%

$R_f$  = 0.4 (10 % methanol in chloroform)

**M. Pt.:** 168-170

**IR (thin film)  $\nu_{\text{max}}$ :** 3294, 2918, 1778, 1643, 1495, 1018, 701  $\text{cm}^{-1}$

**$^1\text{H}$  NMR (DMSO- $d_6$ , 400 MHz):**  $\delta$  9.73 (1H, s), 7.60-7.45 (6H, m), 7.37 (1H, d,  $J$  = 8.4 Hz), 7.26 (1H, d,  $J$  = 8.4 Hz), 4.29 (2H, s), 3.99 (2H, s) and 3.20 (3H, s)

**$^{13}\text{C}$  NMR (DMSO- $d_6$ , 100.6 MHz):**  $\delta$  170.9, 164.9, 154.3, 142.0, 137.9, 134.8, 131.3, 130.2, 128.5, 127.4, 113.7, 109.6, 101.6, 61.9, 43.5 and 37.3

**HR-ESI-TOF-MS:**  $m/z$  418.0387 ( $[\text{M}+\text{H}]^+$ ), calcd. for  $[\text{C}_{18}\text{H}_{16}\text{BrN}_3\text{O}_4+\text{H}]^+$  418.0397.

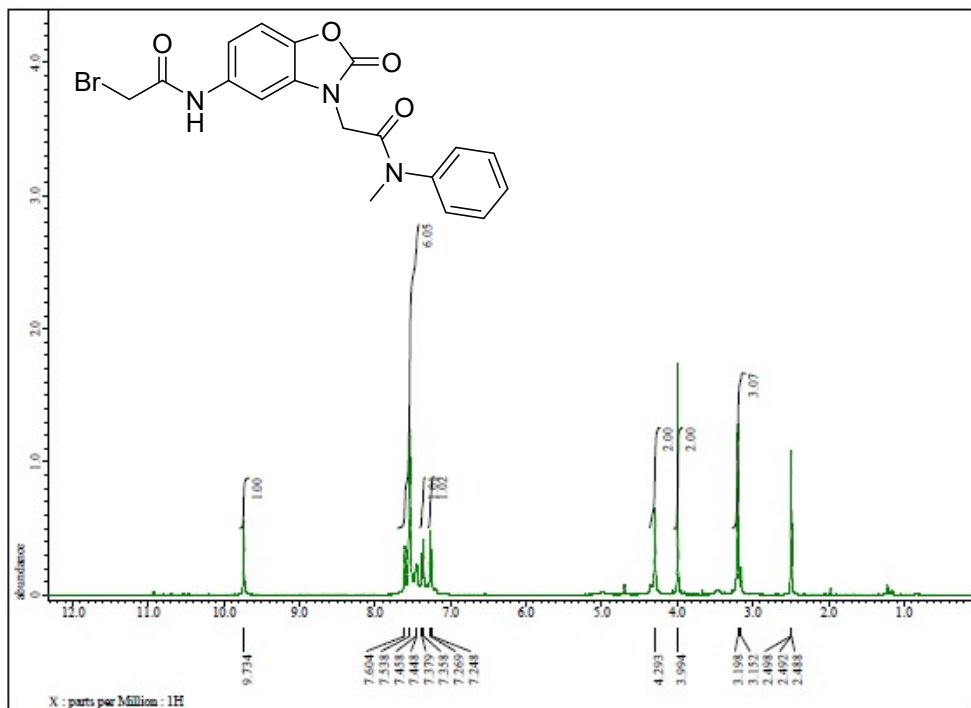

**Figure 3:** <sup>1</sup>H NMR spectrum of compound 4 (400 MHz, DMSO-*d*<sub>6</sub>)

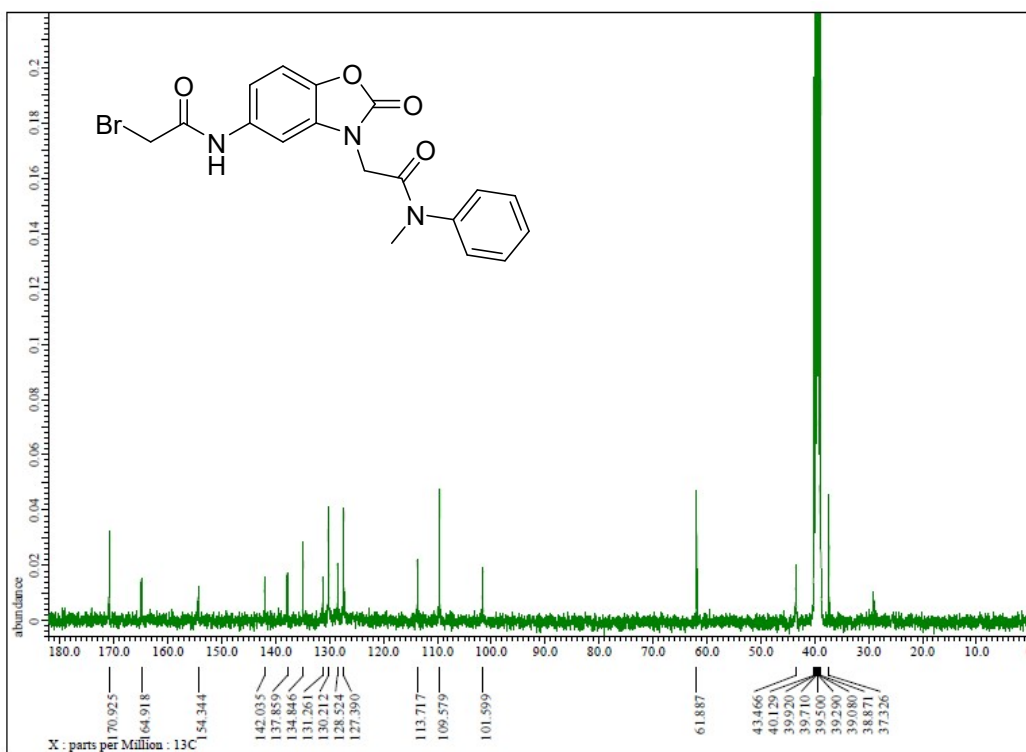

**Figure 4:** <sup>13</sup>C NMR spectrum of compound 4 (100.6 MHz, DMSO-*d*<sub>6</sub>)

➤ **Characterization of 2-(5-(2-(bis(pyridin-2-ylmethyl)amino)acetamido)-2-oxobenzo[d]oxazol-3(2H)-yl)-N-methyl-N-phenylacetamide (5)**

**Physical state and Yield:** off-white solid (0.21 g, 54 %)

**R<sub>f</sub>** = 0.2 (20 % MeOH in CHCl<sub>3</sub>)

**<sup>1</sup>H NMR (DMSO-*d*<sub>6</sub>, 400 MHz):** δ 10.70 (1H, brs), 8.57 (2H, d, *J* = 4.4 Hz), 7.77 (2H, t, *J* = 7.6 Hz), 7.61 (1H, s), 7.53 (2H, s), 7.53 (2H, s), 7.45 (2H, d, *J* = 7.6 Hz), 7.29 (5H, s), 4.35 (2H, s), 3.94 (4H, s), 3.47 (2H, s) and 3.21 (3H, s)

**<sup>13</sup>C NMR (DMSO-*d*<sub>6</sub>, 100.6 MHz):** δ 169.2, 165.0, 158.2, 154.3, 149.0, 142.0, 137.7, 136.9, 135.2, 131.4, 130.2, 128.5, 127.4, 123.2, 122.6, 113.1, 109.7, 101.1, 59.3, 57.7, 43.5 and 37.3

**HR-ESI-TOF-MS:** *m/z* 537.2256 ([M+H]<sup>+</sup>), calcd. for [C<sub>30</sub>H<sub>28</sub>N<sub>6</sub>O<sub>4</sub>+H]<sup>+</sup> 537.2245.

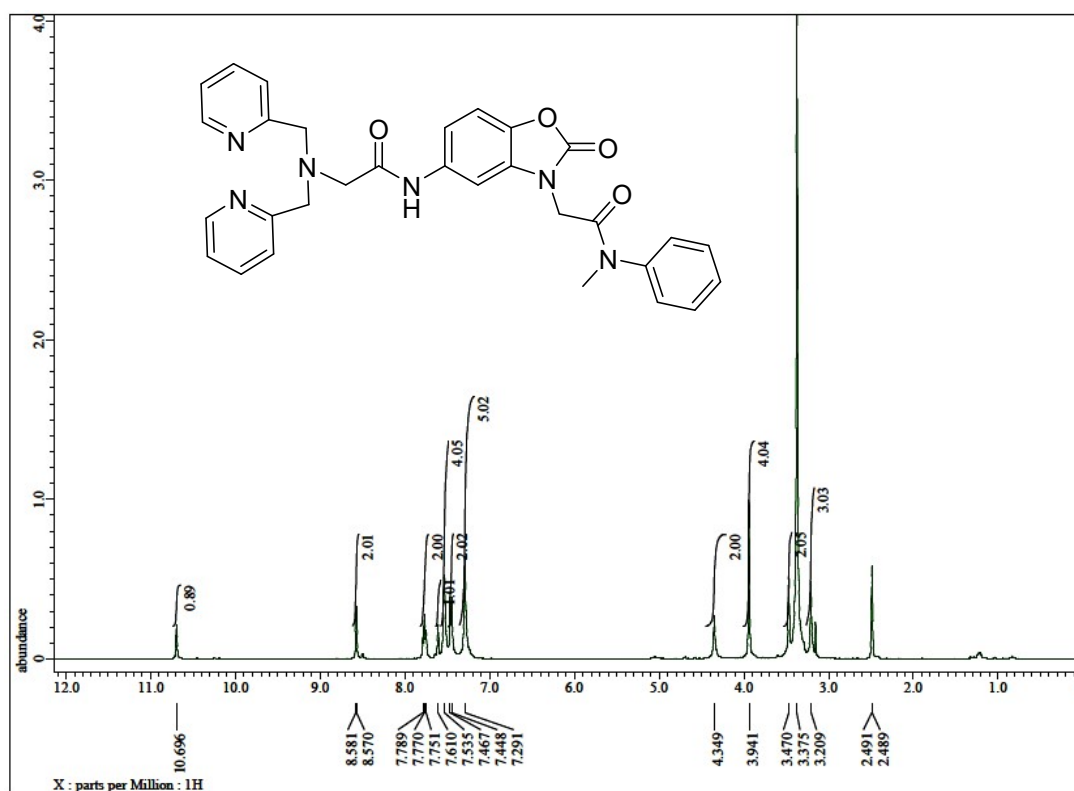

**Figure 5:** <sup>1</sup>H NMR spectrum of compound 5 (DMSO-*d*<sub>6</sub>, 400 MHz)

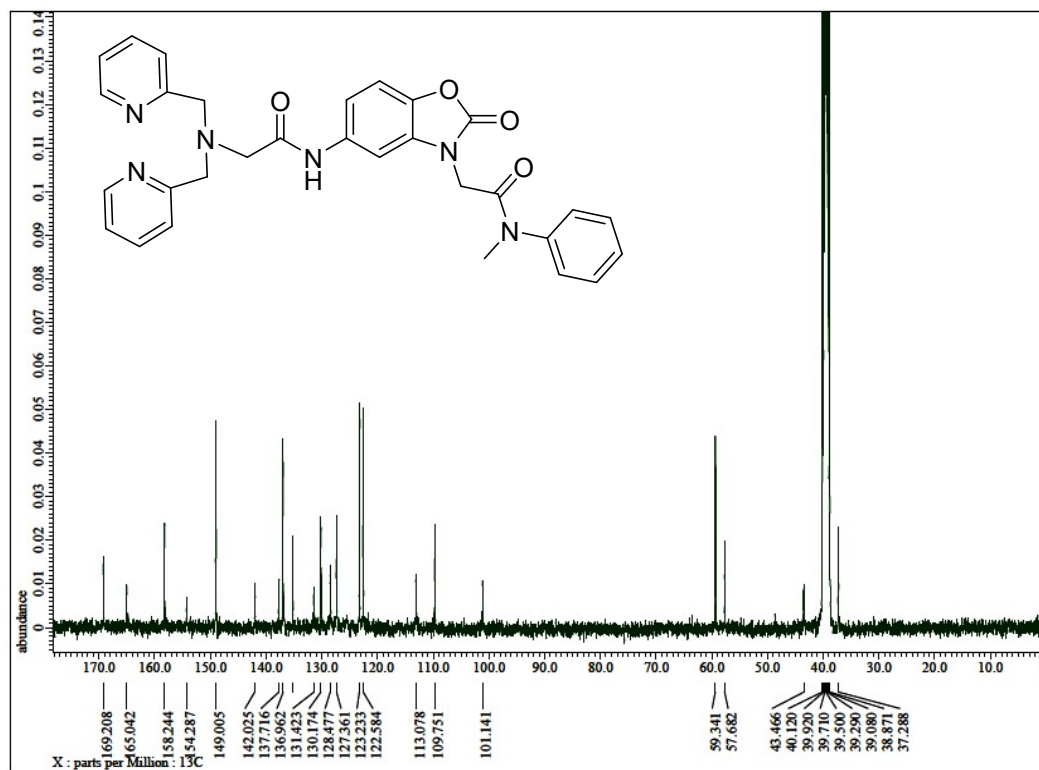

Figure 6: <sup>13</sup>C NMR spectrum of compound 5 (DMSO-*d*<sub>6</sub>, 100.6 MHz)

- **Characterization of 2,2'-(ethane-1,2-diylbis((3-(2-(methyl(phenyl)amino)-2-oxoethyl)-2-oxo-2,3-dihydrobenzo[d]oxazol-5-yl)amino)-2-oxoethyl)azanediyl) diacetic acid (6)**

**Physical state and Yield:** white solid (0.28 g, 85 %)

**IR (KBr)  $\nu_{\max}$ :** 3286, 2982, 1774, 1660, 1491, 1389, 1229, 697  $\text{cm}^{-1}$

**<sup>1</sup>H NMR (DMSO-*d*<sub>6</sub>, 400 MHz):**  $\delta$  10.24 (2H, brs), 8.30 (1H, s), 7.94 (1H, s), 7.57-7.43 (12H, m), 7.28-7.19 (4H, m), 4.28 (4H, s), 3.53 (10H, s), 3.17 (4H, s) and 2.88 (4H, s)

**<sup>13</sup>C NMR (DMSO-*d*<sub>6</sub>, 100.6 MHz):**  $\delta$  172.83, 172.05, 169.51, 164.89, 162.32, 154.25, 141.98, 137.89, 135.20, 131.23, 130.11, 128.60, 127.29, 113.10, 109.54, 100.10, 79.32, 64.94, 57.10, 55.37, 54.61, 52.15, 43.36, 37.21 and 35.81

**HR-ESI-TOF-MS:**  $m/z$  851.2946 ( $[M+H]^+$ ), calcd. for  $[C_{42}H_{42}N_8O_{12}+H]^+$  851.2995

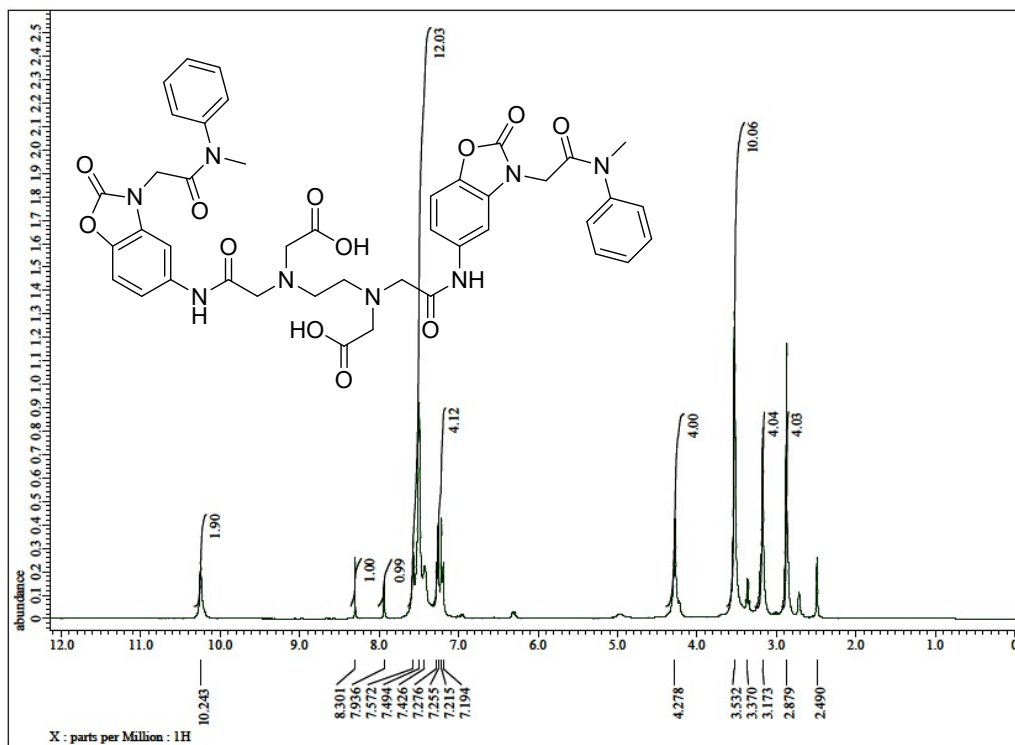

Figure 7: <sup>1</sup>H NMR spectrum of compound 6 (DMSO-d<sub>6</sub>, 400 MHz)

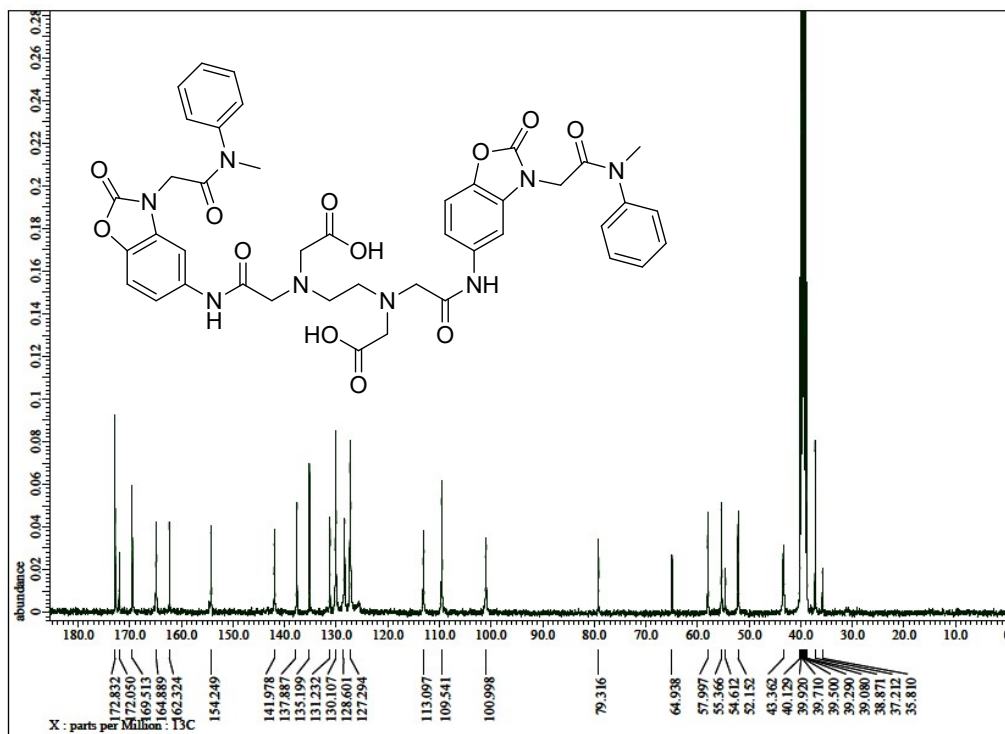

Figure 8: <sup>13</sup>C NMR spectrum of compound 6 (DMSO-d<sub>6</sub>, 100.6 MHz)
